# Supplementary material for: Rectal Sparing Approaches after Neoadjuvant Treatment for Rectal Cancer: A Systematic Review and Meta-Analysis Comparing Local Excision and Watch and Wait
Source: MDPI journal article supplement (doi:10.3390/cancers15020465), 2023-01-11
Supplement: s1 [file s1]

Supplementary files  
Table S1. GRADE Quality of Evidence

| Certainty assessment             |                       |                           |                      |                      |                      |                                                                         | № of patients  |                | Effect                    |                                                    | Certainty                                                                                       | Importance |
|----------------------------------|-----------------------|---------------------------|----------------------|----------------------|----------------------|-------------------------------------------------------------------------|----------------|----------------|---------------------------|----------------------------------------------------|-------------------------------------------------------------------------------------------------|------------|
| № of studies                     | Study design          | Risk of bias              | Inconsistency        | Indirectness         | Imprecision          | Other considerations                                                    | Watch and Wait | Local Excision | Relative (95% CI)         | Absolute (95% CI)                                  |                                                                                                 |            |
| Overall rectal preservation rate |                       |                           |                      |                      |                      |                                                                         |                |                |                           |                                                    |                                                                                                 |            |
| 8                                | observational studies | very serious <sup>a</sup> | serious <sup>b</sup> | serious <sup>c</sup> | serious <sup>d</sup> | all plausible residual confounding would reduce the demonstrated effect | 23/213 (10.8%) | 29/188 (15.4%) | OR 0.80<br>(0.31 to 2.01) | 27 fewer per 1.000<br>(from 101 fewer to 114 more) | <br>Very low | CRITICAL   |
| Locoregional Failure             |                       |                           |                      |                      |                      |                                                                         |                |                |                           |                                                    |                                                                                                 |            |
| 5                                | observational studies | very serious <sup>a</sup> | serious <sup>b</sup> | serious <sup>c</sup> | serious <sup>a</sup> | all plausible residual confounding would reduce the demonstrated effect | 12/119 (10.1%) | 12/133 (9.0%)  | OR 0.85<br>(0.20 to 3.66) | 12 fewer per 1.000<br>(from 71 fewer to 176 more)  | <br>Very low | CRITICAL   |
| Local Disease Free Survival      |                       |                           |                      |                      |                      |                                                                         |                |                |                           |                                                    |                                                                                                 |            |
| 8                                | observational studies | very serious <sup>a</sup> | serious <sup>b</sup> | serious <sup>c</sup> | serious              | all plausible residual confounding would reduce the demonstrated effect | 46/213 (21.6%) | 25/188 (13.3%) | OR 1.60<br>(0.75 to 3.42) | 64 more per 1.000<br>(from 30 fewer to 211 more)   | <br>Very low | IMPORTANT  |
| Distant recurrence               |                       |                           |                      |                      |                      |                                                                         |                |                |                           |                                                    |                                                                                                 |            |
| 8                                | observational studies | very serious <sup>a</sup> | serious <sup>b</sup> | serious <sup>c</sup> | serious              | all plausible residual confounding would reduce the demonstrated effect | 19/213 (8.9%)  | 23/188 (12.2%) | OR 0.76<br>(0.37 to 1.55) | 27 fewer per 1.000<br>(from 73 fewer to 55 more)   | <br>Very low | CRITICAL   |

CI: confidence interval; OR: odds ratio

Explanations

- a. Most of the studies are retrospective, and one phase II study. The rate of rectal preservation is often not included as main or secondary outcome. The definition of local recurrence and local regrowth is often overlapped or ambiguous. Some studies included a wide study period. Different definition of inclusions criteria (complete or near-complete clinical response).
- b. Most of the studies included complete and near-complete clinical response, however a indication for a treatment or the other are often not explained.
- c. Some studies included comparison between Watch and wait, local excision, and total mesorectal excision, and the comparison between Watch and Wait and local excision were extracted from subgroup analysis,
- d. Low number of events (rectal resection, or TME) due to patients refusal or unfit or not defined criteria for completion TME.
- e. Locoregional failure often not defined by the Authors, and extracted from clinical and long-term outcomes.
